# Supplementary material for: The impact of iron–boron electrocatalysts on the charge transport and oxygen evolution reaction of bismuth vanadate photoanodes
Source: Royal Society of Chemistry journal article supplement (doi:10.1039/d2dt04009c), 2023-01-01
Supplement: d2dt04009c1.pdf [file d2dt04009c1.pdf]

## Supporting Information

### **The impact of iron-boron electrocatalysts on the charge transport and oxygen evolution reaction of bismuth vanadate photoanodes**

Yingfei Hu,<sup>a</sup> Qingyuan Hu,<sup>a</sup> Yujia Qi,<sup>a</sup> Wenyan Zhang,<sup>a</sup> Chao Liu,<sup>b</sup> Yuanyuan Wang,<sup>\*a</sup> Hangmin Guan,<sup>\*a</sup> and Lingyun Hao<sup>a</sup>

<sup>a</sup>School of Materials Engineering, Jinling Institute of Technology, Nanjing 211169, P. R. China

E-mail: wangyuanyuan@jit.edu.cn; guan@jit.edu.cn

<sup>b</sup>School of Materials Science and Engineering, Yancheng Institute of Technology, Yancheng 224051, P. R. China

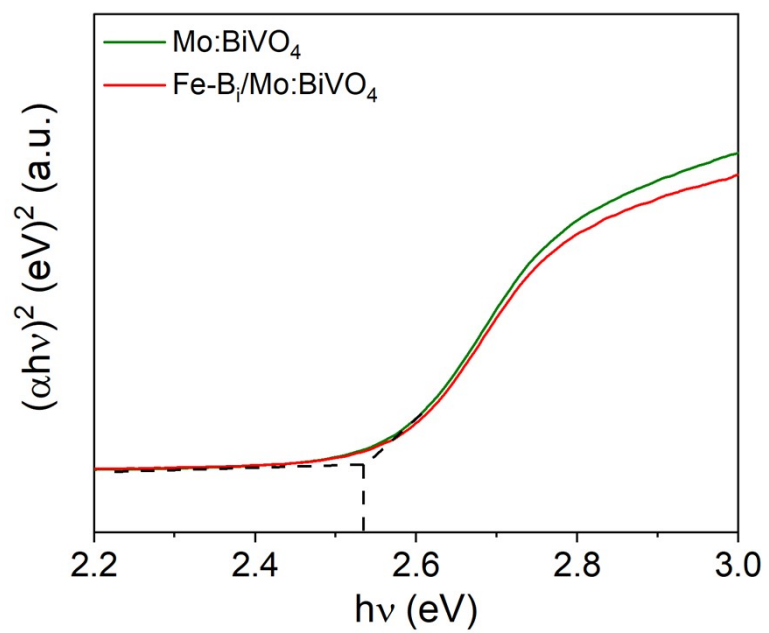

**Fig. S1** Tauc plots of Mo:BiVO<sub>4</sub> and Fe-B<sub>i</sub>/Mo:BiVO<sub>4</sub> photoanodes.

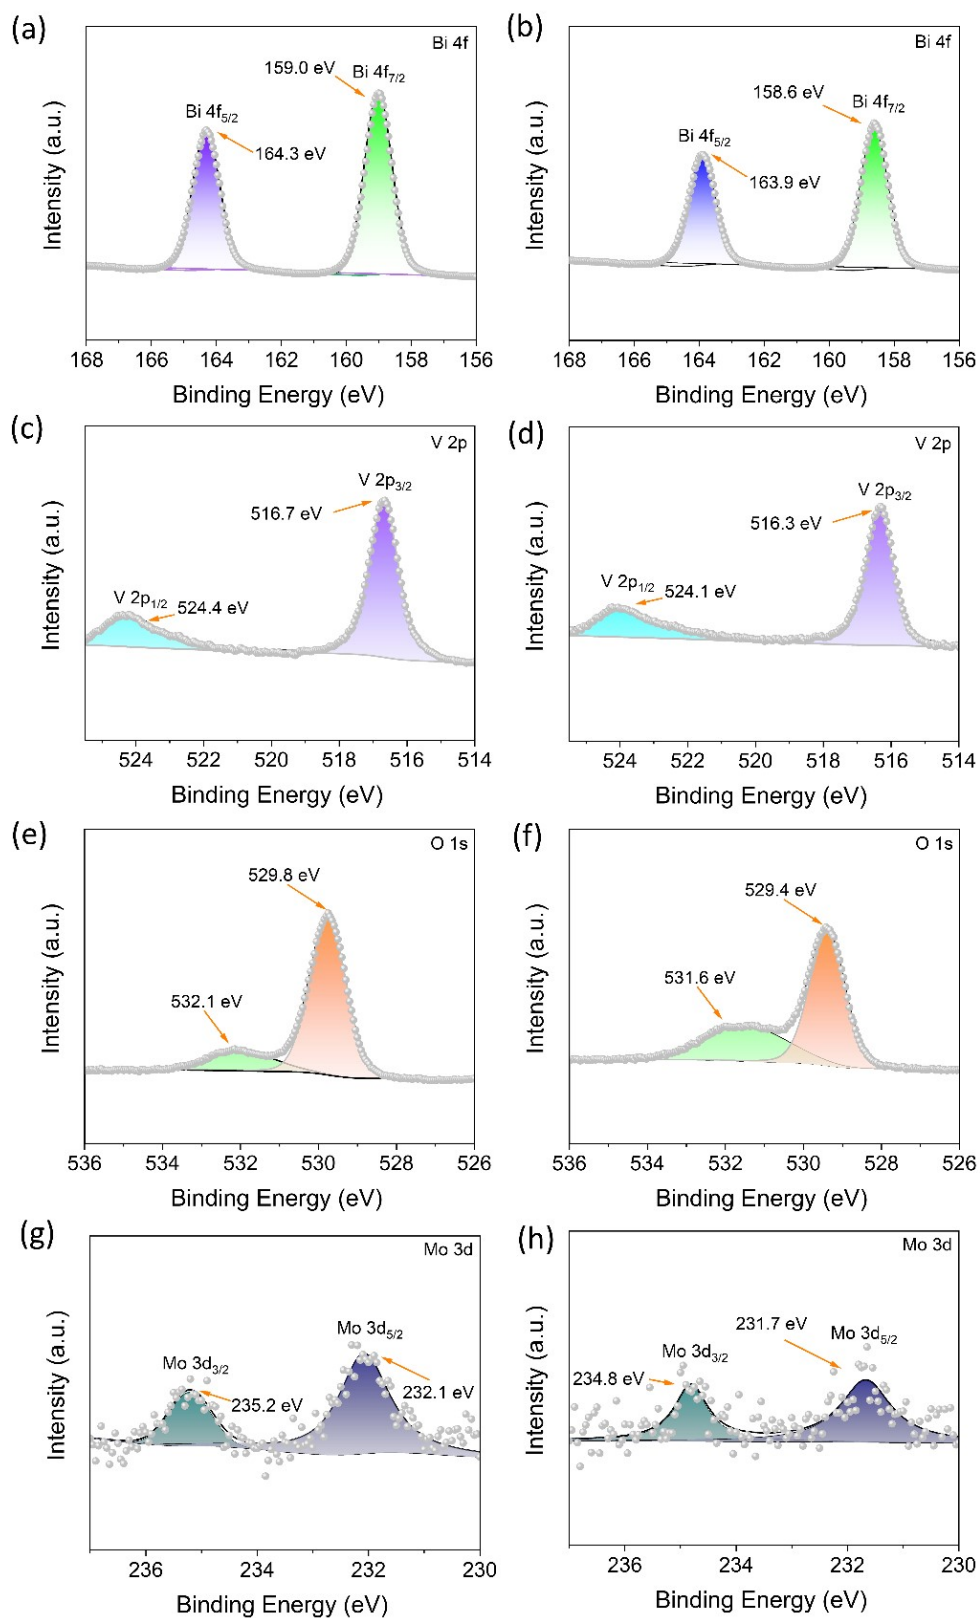

**Fig. S2** XPS spectra of (a), (b) Bi 4f; (c), (d) V 2p; (e), (f) O 1s; and (g), (h) Mo 3d orbitals in Mo:BiVO<sub>4</sub> and Fe-Bi/Mo:BiVO<sub>4</sub> samples.

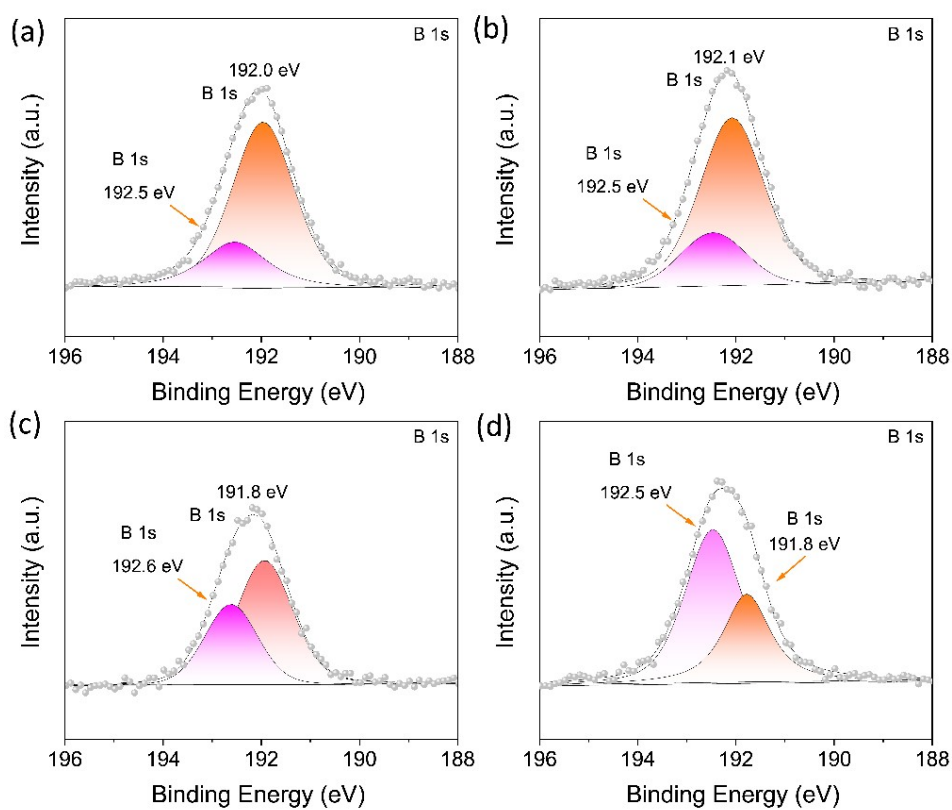

**Fig. S3** XPS spectra of B 1s orbits in Fe-B<sub>i</sub>/Mo:BiVO<sub>4</sub> samples: (a) 0.8 mM, (b) 1.6 mM, (c) 2.4 mM, (d) 3.2 mM.

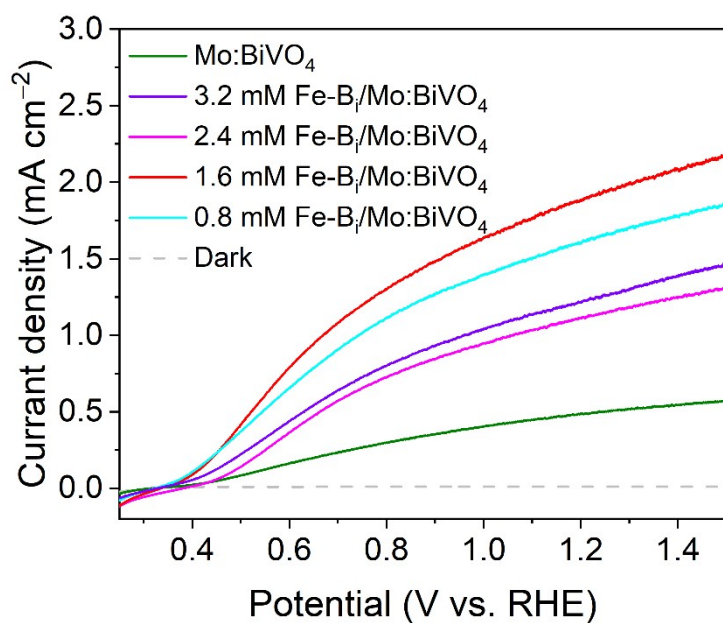

**Fig. S4** J-V curves of Mo:BiVO<sub>4</sub> and various Fe-B<sub>i</sub>/Mo:BiVO<sub>4</sub> photoanodes in KB<sub>i</sub> (pH = 9.2).

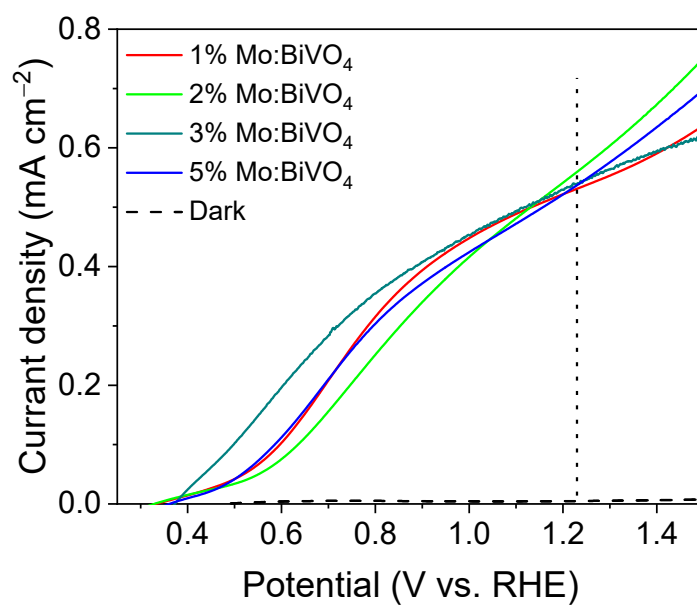

**Fig. S5**  $J$ - $V$  curves of Mo:BiVO<sub>4</sub> photoanodes with different amounts of Mo in KBi (pH = 9.2).

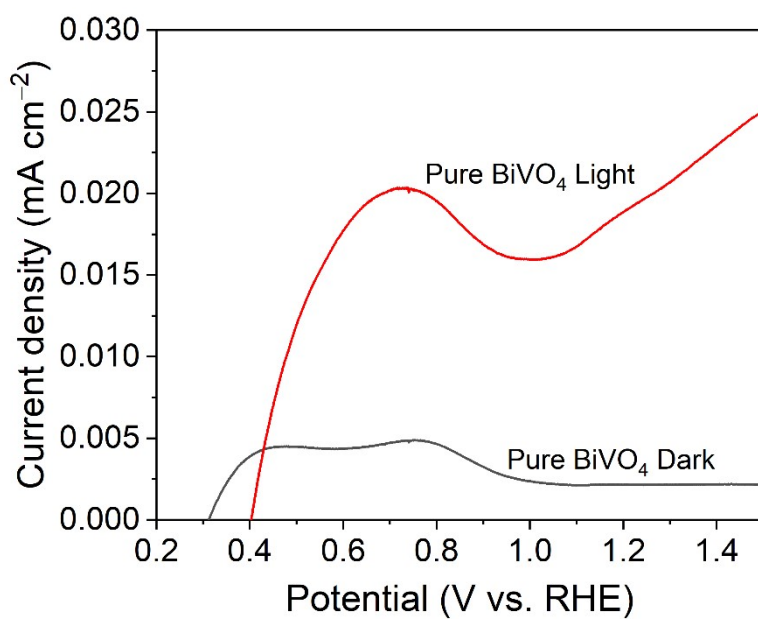

**Fig. S6**  $J$ - $V$  curves of the pure BiVO<sub>4</sub> photoanode in dark and under illumination.
